# Supplementary material
Source: PubMed Central journal article supplement (PMC3110489)
Supplement: supp_cwr026_cwr026supp.pdf [file supp_cwr026_cwr026supp.pdf]

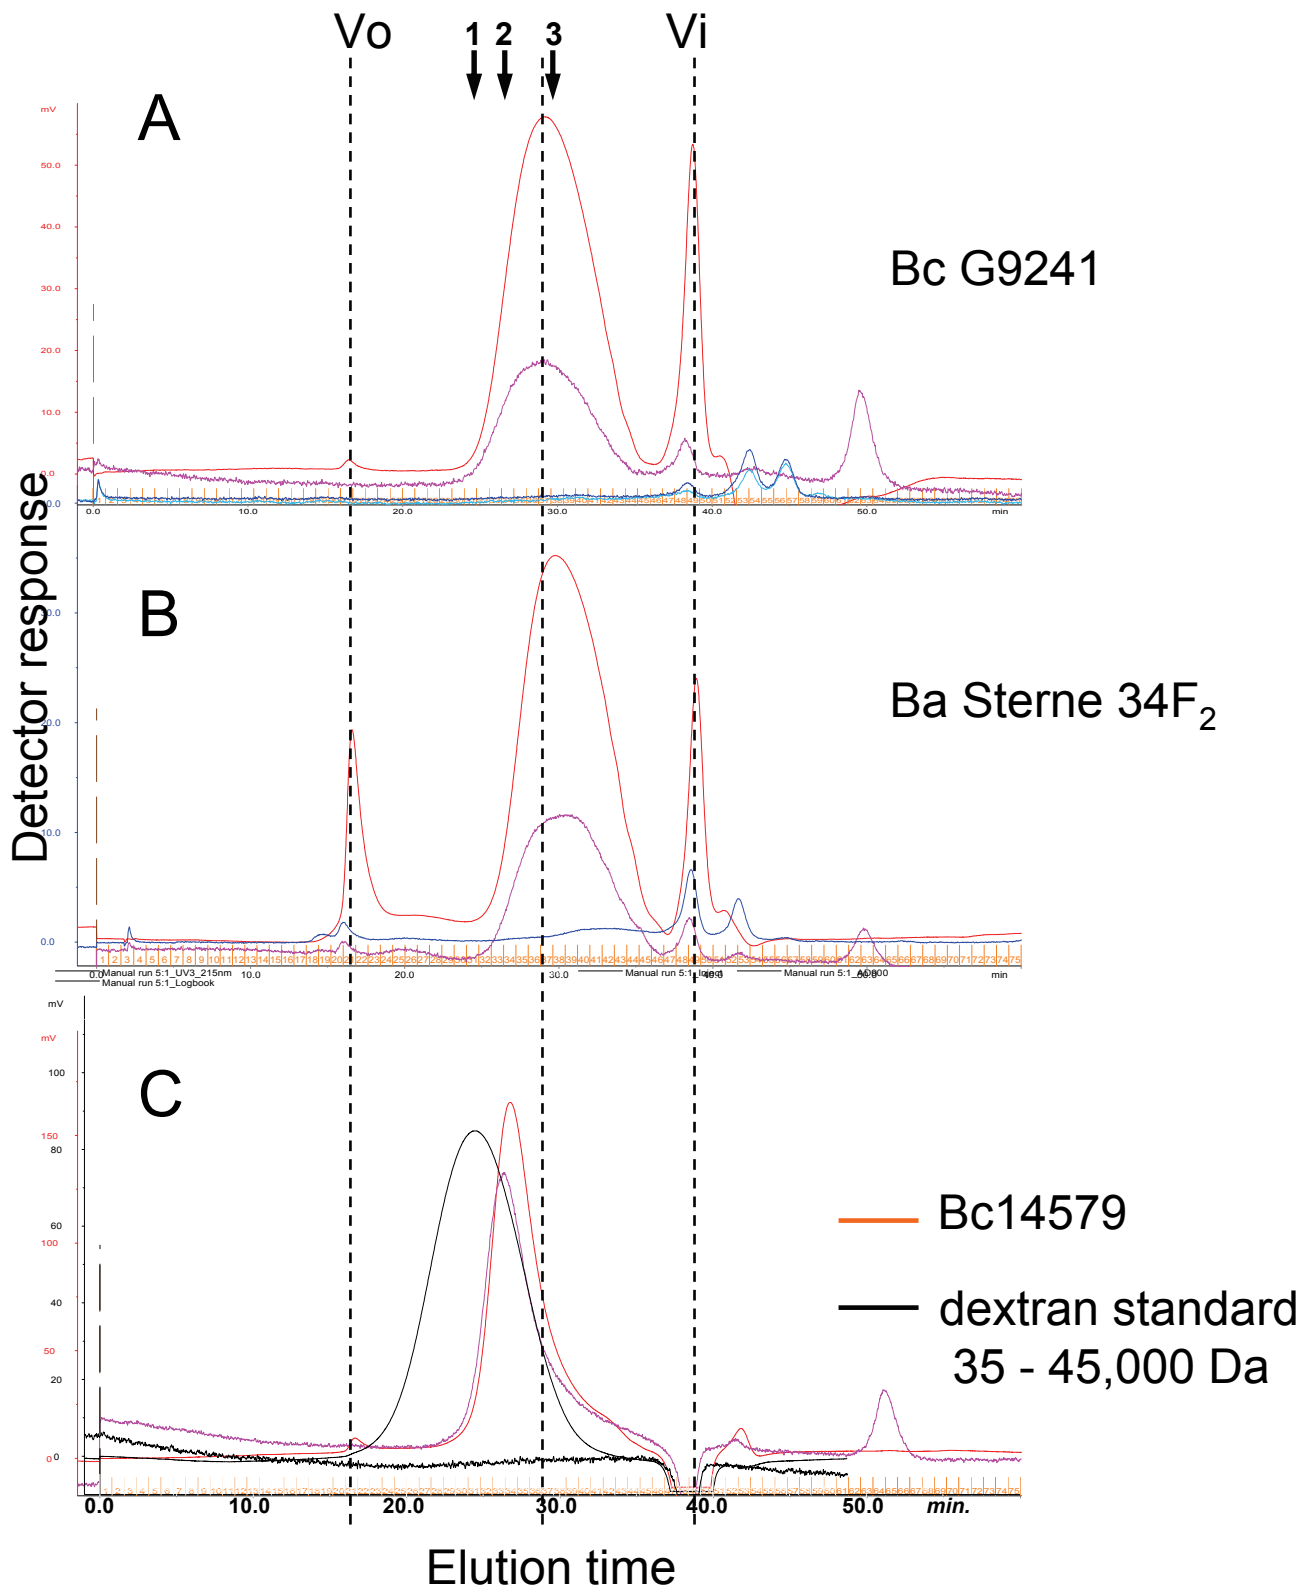

Supplemental Fig. S1

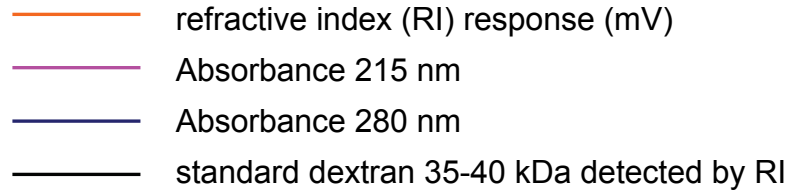

### Supplemental Fig. S1

**Purification and molecular mass estimation of the SCWP isolated from different *Bacillus* strains.** SCWPs were released from cell walls by treatment with hydrofluoric acid, dialyzed, then chromatographed on a Superose-12 FPLC size exclusion column, in comparison to standard  $\alpha$ 1 $\rightarrow$ 6 linked dextrans. **A**, *B. cereus* G9241. **B**, *B. anthracis* Sterne 34F2. **C**, type strain *B. cereus* ATCC14579. The SCWP from the pathogenic *B. cereus* and *B. anthracis* strains elute at approximately the same location, between the 25 kDa and 11 kDa dextran standards, ( $K_{av}$  = 0.411, calc. mass 12,040 Da). The elution profile of *B. cereus* 03BB87 SCWP was essentially identical to that of *Bc*G9241, while *Bc* 03BB102 SCWP had  $K_{av}$  = 0.448, calc. mass 9,370 Da (not shown). For comparison, the non-pathogenic *B. cereus* type strain ATCC14579 SCWP elutes slightly after the 25 kDa dextran, ( $K_{av}$  = 0.337; calc. mass 20,020 Da). The *Bacillus* SCWP preparations, in particular those from *B. anthracis*, contain variable amounts of a high molecular weight glucan which elutes at the void volume ( $V_0$ ). Glycosyl composition and NMR analysis (COSY, TOCSY, HSQC) indicated that in all strains it was exclusively a polysaccharide composed of glucose in predominately  $\alpha$ 1 $\rightarrow$ 4 linkage. This glucan was most prevalent in the *B. anthracis* strains, and may correspond to a glycogen storage polysaccharide reported previously in certain *B. cereus* and other *Bacillus* strains. Column total inclusion volume, ( $V_i$ ). In addition to the 35-45 kDa dextran profile, the elution positions of the 25 kDa and 11 kDa dextrans are indicated (**1**= 35-45 kDa; **2** = 25 kDa; **3** = 11 kDa). Molecular mass of SCWPs were estimated by comparing their observed  $K_{av}$  with those of standard dextrans, plotted vs. log MW.

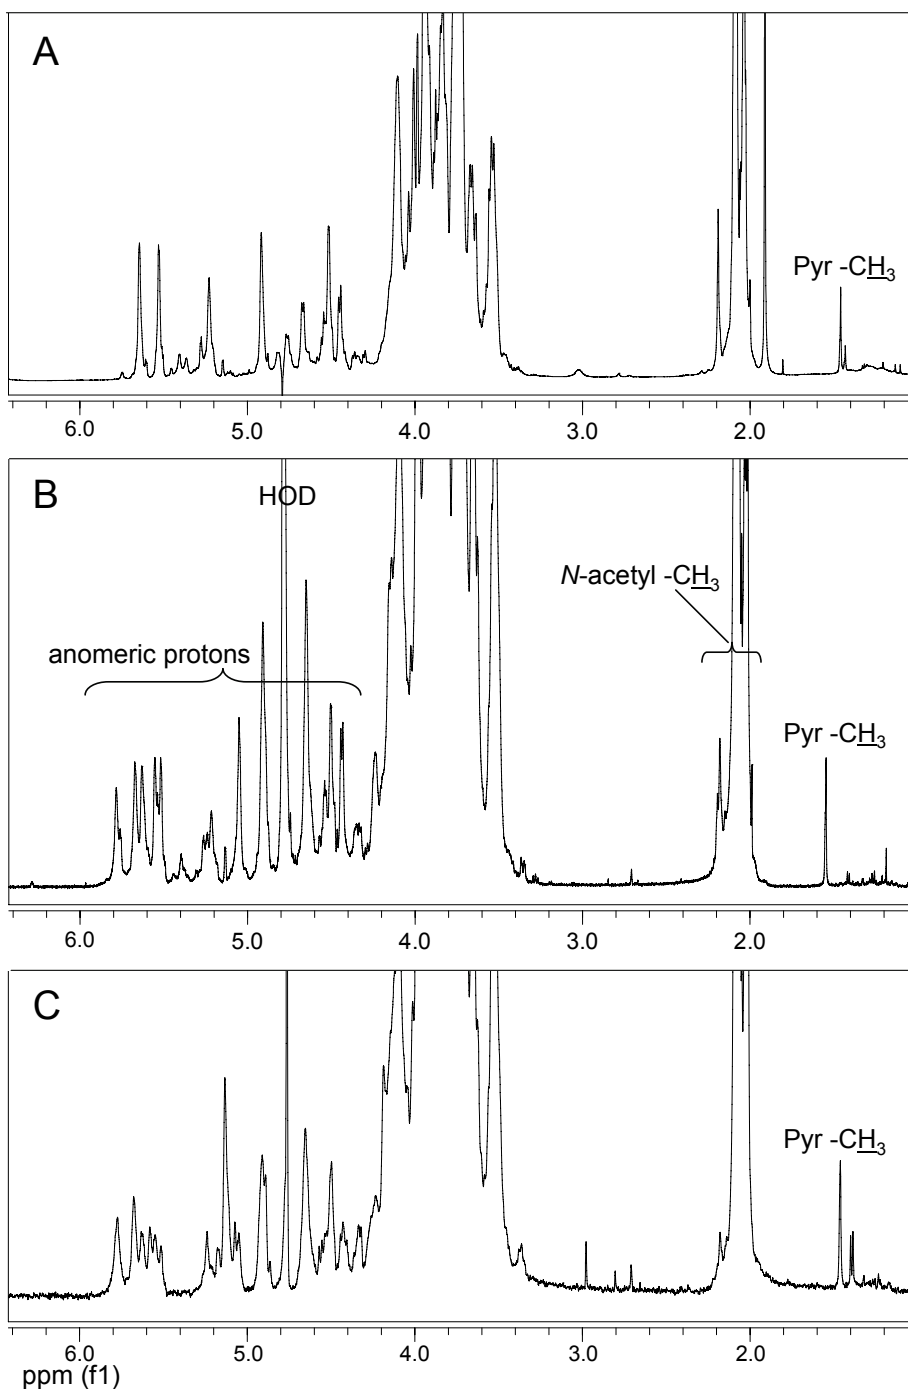

### Supplemental Fig. S2

**Comparison of 600-MHz proton NMR spectra for the SCWP from *B. anthracis* and pathogenic *B. cereus* strains.** **A**, *B. anthracis* Sterne 7702; **B**, *B. cereus* G9241; and **C**, *B. cereus* 03BB102. Significant features of the *BcG9241* spectrum included numerous anomer protons ( $\delta$  5.78 – 4.30), and three major signals arising from *N*-acetyl protons ( $\delta$  2.02 – 2.09). All strains displayed a minor signal at  $\delta$  1.54 -1.47 identified as the -CH<sub>3</sub> protons of pyruvic acid. The *BcG9241* SCWP contains additional anomer signals compared to *B. anthracis*, and the *Bc03BB102* spectrum shows even greater heterogeneity in this region. The SCWP from *Bc03BB87* gives the same spectrum as shown for *BcG9241*.

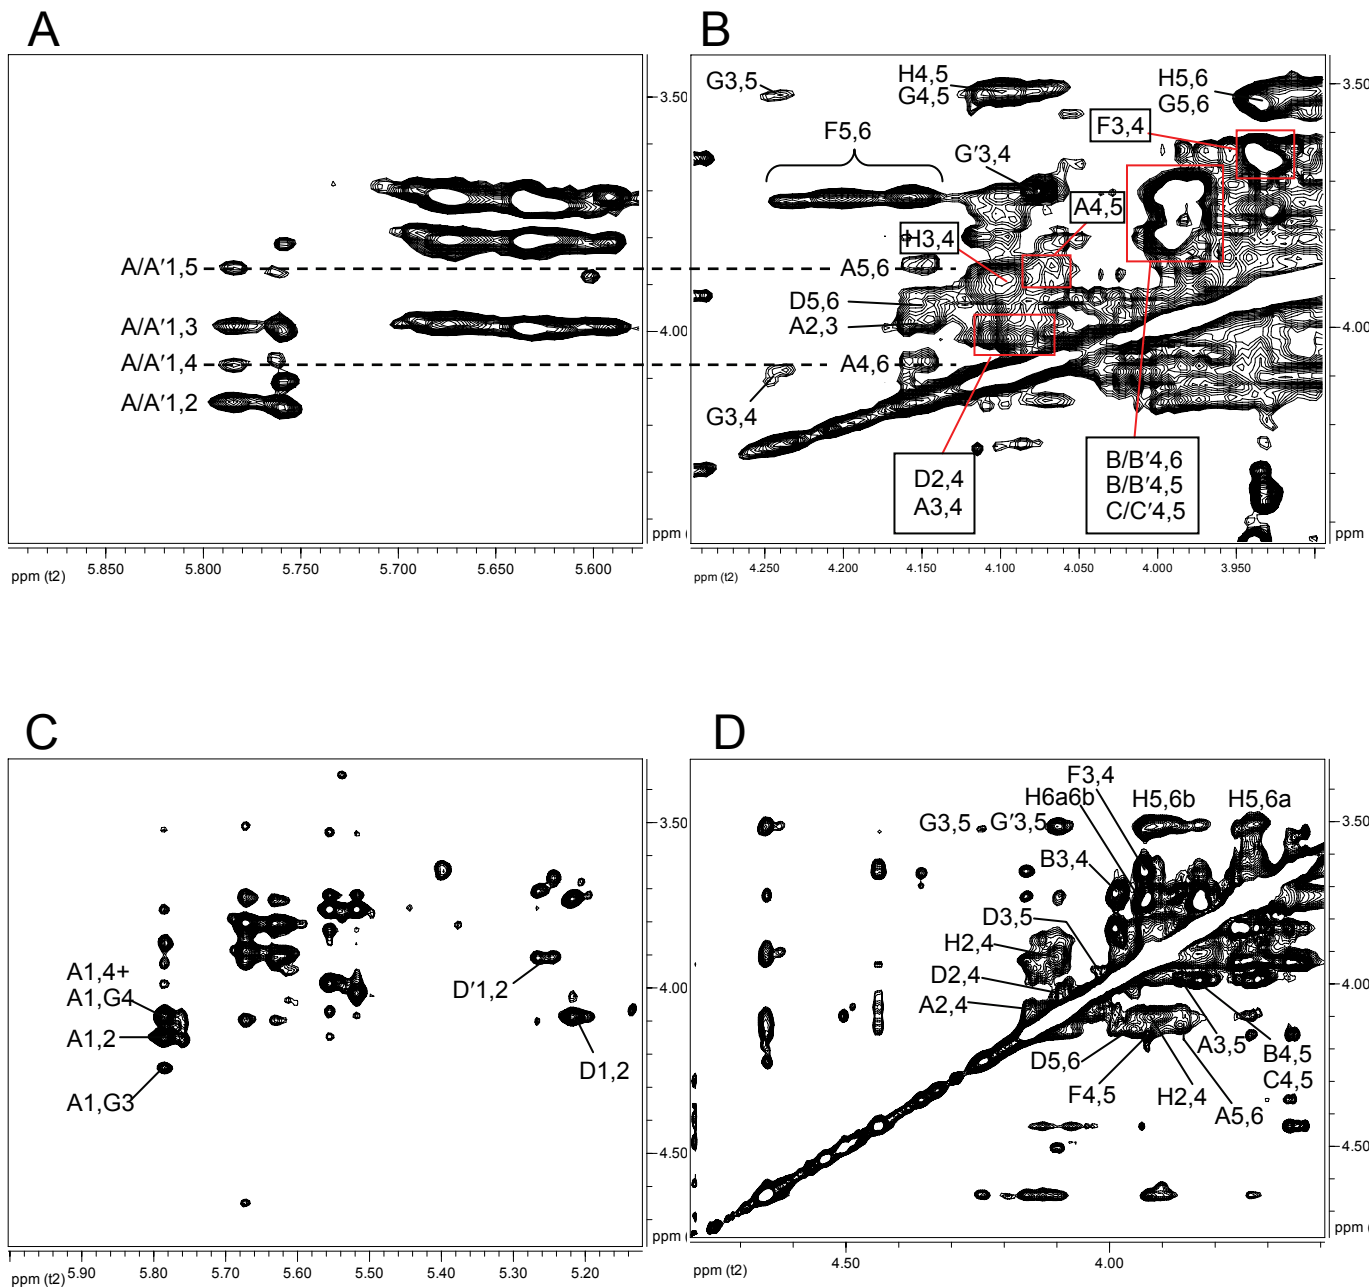

**Supplemental Fig. S3**

**Partial 800-MHz NMR spectra of the *B. cereus* G9241 SCWP.** Panels **A** and **B**,  $^1\text{H}$ - $^1\text{H}$ -TOCSY spectra showing major ring proton scalar connectivities for residues A, B, C, D, F, G and H. Panels **C** and **D**,  $^1\text{H}$ - $^1\text{H}$ -NOESY spectra showing major ring proton NOEs for residues A, B, C, D, F, G, and H. Additional TOCSY and NOESY connectivities involving the anomeric protons are identified in **Figs. 5** and **6** of main text.

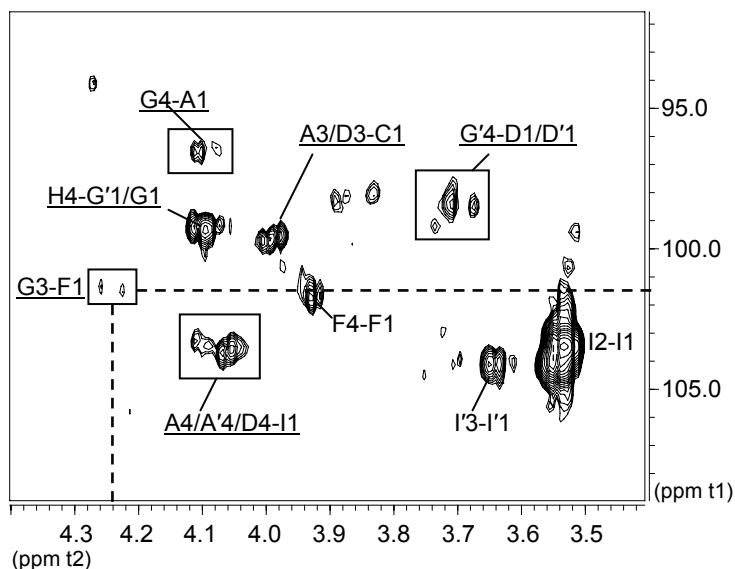

**Supplemental Fig. S4**

**Partial 800-MHz  $^1\text{H}$ - $^{13}\text{C}$  HMBC spectrum of the *B. cereus* G9241 SCWP.**

The region is plotted with increased signal amplitude to allow display of the weak inter-residue correlation G3-F1. Inter-residue correlations defining glycosidic linkages are underlined. All connectivities are listed in the sequence: "proton-carbon", for example: G4-A1 designates a three-bond inter-residue correlation between H4 of residue **G** and the anomeric carbon of residue **A**. Additional connectivities are shown in **Fig. 8** of main text. Coupling intensities are not indicative of residue stoichiometry.

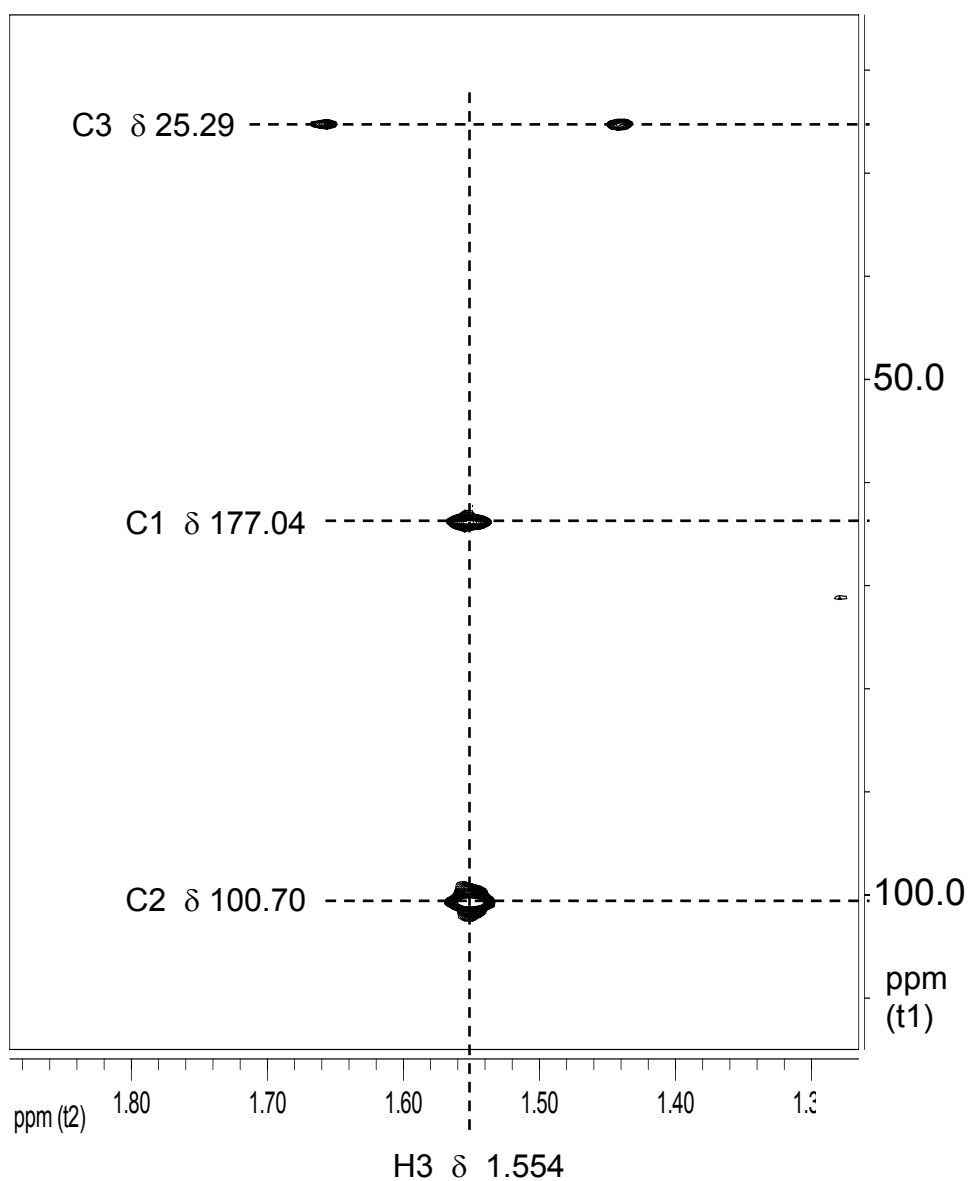

**Supplemental Fig. S5**

**Partial  $^1\text{H}$ - $^{13}\text{C}$  HMBC spectrum of the *B. cereus* G9241 SCWP showing connectivities defining pyruvate, between the methyl group protons and carbons-1, 2, and 3. The correlation to C1 has been folded back into the displayed spectrum (calculated  $\delta_{\text{C}} 177.04$ ). Residual carbon-proton coupling at C3 results in splitting of the H3 signal.**

**Section --Supplementary NMR Data**

**$\alpha$ -Galp residues:** Summary of data for identification of  $\alpha$ -Galp residues **B/B'** and **C/C'**

The *galacto*- configuration for residues **B/B'** was assigned from COSY, TOCSY, NOESY and HSQC analyses (**Table III**). Magnetization transfer was evident from proton H1 only thru H4 in COSY and TOCSY, consistent with the *galacto*- configuration, and the remaining positions were deduced from scalar couplings between H6/H5/H4 in TOCSY and by NOEs between protons H3/H5, H3/H4, and H4/H5. The carbon shifts and observed NOEs are consistent with the  $\alpha$ -pyranosidic ring form and  ${}^4C_1$  conformation. Further confirmation was obtained from  ${}^1H$ - ${}^{13}C$ -HSQC-TOCSY analysis, which revealed connectivities between H4/C4 and H3/C3, and between H4/C4-H5/C5-H6/C6 for both the **B** and **C** ring systems (not shown). The  $J_{C1,H1}$  coupling constants (**Table III**) were consistent with the  $\alpha$ -anomeric configuration and the  $\delta_C$  values for carbons C2 thru C6 were within range to indicate that both pairs of residues, **B/B'**, and **C/C'**, are terminal unsubstituted  $\alpha$ -Gal pyranose residues.

**$\beta$ -Galp residues:**

**Supplemental Table I** Additional, minor  $\beta$ -Gal systems (residue **I** series) partially assigned, also refer to **Figure 4D**;  $\delta_H$  (black);  $\delta_C$  (red)

|                    |                |                |               |                                         |                                   |                   |
|--------------------|----------------|----------------|---------------|-----------------------------------------|-----------------------------------|-------------------|
| I' $\beta$ -Gal    | 4.57<br>100.77 | 3.47           | 3.63<br>72.32 | 3.91<br>69.83 <sup>c</sup>              | 3.64<br>74.6                      | Not assigned      |
| I'' $\beta$ -Gal   | 4.54<br>102.28 | 3.54<br>72.41  | 3.67<br>73.48 | 3.93 <sup>a</sup><br>68.33 <sup>c</sup> | 3.50 <sup>b</sup><br>74.99        | 3.74/3.81<br>60.6 |
| I''' $\beta$ -Gal  | 4.35<br>102.92 | 3.55<br>74.93? | 3.65<br>75.20 | 3.93 <sup>a</sup><br>68.98 <sup>c</sup> | 3.54 <sup>b</sup><br>74.8         | Not assigned      |
| I'''' $\beta$ -Gal | 4.33<br>103.14 | 3.54<br>70.69  | 3.65<br>75.20 | 3.93 <sup>a</sup><br>70.06 <sup>c</sup> | 3.53 <sup>b</sup><br>Not assigned | Not assigned      |

<sup>a,b,c</sup> assignments may be interchanged
